# Supplementary material for: CFTR Function Restoration upon Elexacaftor/Tezacaftor/Ivacaftor Treatment in Patient-Derived Intestinal Organoids with Rare CFTR Genotypes
Source: Int J Mol Sci. 2023 Sep 26;24(19):14539. doi: 10.3390/ijms241914539 (PMC10572896; doi:10.3390/ijms241914539)
Supplement: Supplementary file 1 [file ijms-24-14539-s001.zip]

Archive with 6 entries (6 files):
- Legends_supps.pdf
- SupFig1.png
- SupFig2.png
- SupFig3.png
- SupFig4.png
- table S1_F508del genotypes_revised.pdf
