# Supplementary material for: CFTR Function Restoration upon Elexacaftor/Tezacaftor/Ivacaftor Treatment in Patient-Derived Intestinal Organoids with Rare CFTR Genotypes
Source: Int J Mol Sci. 2023 Sep 26;24(19):14539. doi: 10.3390/ijms241914539 (PMC10572896; doi:10.3390/ijms241914539)
Supplement: Supplementary file 1 [file ijms-24-14539-s001.zip › table S1_F508del genotypes_revised.pdf]

| <b>Donor ID</b> | <b>Allele 1</b> | <b>Allele 2</b> |
|-----------------|-----------------|-----------------|
| PDIO 01         | F508del         | R1162X          |
| PDIO 02         | F508del         | G542X           |
| PDIO 03         | F508del         | Y1092X          |
| PDIO 04         | F508del         | R1162X          |
| PDIO 05         | F508del         | R1162X          |
| PDIO 06         | F508del         | E730X           |
| PDIO 07         | F508del         | Y1092X          |
| PDIO 08         | F508del         | Y1092X          |
| PDIO 09         | F508del         | S489X           |
| PDIO 10         | F508del         | R553X           |
| PDIO 11         | F508del         | W1282X          |
| PDIO 12         | F508del         | W1282X          |
| PDIO 13         | F508del         | E60X            |
| PDIO 14         | F508del         | W1282X          |
| PDIO 15         | F508del         | R1158X          |
